# Supplementary material for: Consensus-based guidance for conducting and reporting multi-analyst studies
Source: eLife journal article supplement (doi:10.7554/elife.72185), 2021-11-08
Supplement: supp [file elife-72185-supp-v1.zip]

Archive with 3 entries (3 files):
- elife_poa_e72185_Transparent_Reporting_File.pdf
- elife_poa_e72185_Supplementary_file_1.docx
- elife_poa_e72185_Supplementary_file_2.docx
